# Supplementary material
Source: PubMed Central journal article supplement (PMC8321577)
Supplement: jci-131-148272-s029.pdf [file jci-131-148272-s029.pdf]

## Untargeted metabolomics and infrared ion spectroscopy identify biomarkers for pyridoxine-dependent epilepsy

Udo F.H. Engelke<sup>1\*</sup>, Rianne E. van Outersterp<sup>2\*</sup>, Jona Merx<sup>3\*</sup>, Fred A.M.G. van Geenen<sup>2</sup>, Arno van Rooij<sup>1</sup>, Giel Berden<sup>2</sup>, Marleen C.D.G. Huigen<sup>1</sup>, Leo A.J. Kluijtmans<sup>1</sup>, Tessa M.A. Peters<sup>1,4</sup>, Hilal H. Al-Shekaili<sup>5</sup>, Blair R. Leavitt<sup>5</sup>, Erik de Vrieze<sup>6</sup>, Sanne Broekman<sup>6</sup>, Erwin van Wijk<sup>6</sup>, Laura A. Tseng<sup>7</sup>, Purva Kulkarni<sup>1</sup>, Floris P.J.T. Rutjes<sup>3</sup>, Jasmin Mecinović<sup>3,8</sup>, Eduard A. Struys<sup>9</sup>, Laura A. Jansen<sup>10</sup>, Sidney M. Gospe, Jr.<sup>11</sup>, Saadet Mercimek-Andrews<sup>12,13</sup>, Keith Hyland<sup>14</sup>, Michèl A.A.P. Willemsen<sup>15</sup>, Levinus A. Bok<sup>16</sup>, Clara D.M. van Karnebeek<sup>7,17,18</sup>, Ron A. Wevers<sup>1</sup>, Thomas J. Boltje<sup>3</sup>, Jos Oomens<sup>2,19</sup>, Jonathan Martens<sup>2\*\*</sup>, Karlien L.M. Coene<sup>1\*#</sup>

\*First three and last two authors share author position.

#Corresponding authors:

- Jonathan Martens, Institute for Molecules and Materials, FELIX Laboratory, Radboud University, Toernooiveld 7, 6525 ED Nijmegen, The Netherlands, jonathan.martens@ru.nl, +31243653934

- Karlien L.M. Coene, Department of Laboratory Medicine, Translational Metabolic Laboratory, Radboud University Medical Center, Geert Grooteplein Zuid 10, 6525 GA Nijmegen, The Netherlands, Karlien.Coene@radboudumc.nl, +31243614567

1. Translational Metabolic Laboratory, Department of Laboratory Medicine, Radboud University Medical Center, Nijmegen, The Netherlands

2. Radboud University, Institute for Molecules and Materials, FELIX Laboratory, Nijmegen, The Netherlands

3. Radboud University, Institute for Molecules and Materials, Synthetic Organic Chemistry, Nijmegen, The Netherlands

4. Department of Neurology, Donders Institute for Brain, Cognition and Behavior, Radboud University Medical Center, Nijmegen, The Netherlands

5. Centre for Molecular Medicine and Therapeutics, British Columbia Children's Hospital Research Institute, Department of Medical Genetics, University of British Columbia Vancouver, BC, Canada

6. Department of Otorhinolaryngology, Donders Institute for Brain, Cognition and Behavior, Radboud University Medical Center, Nijmegen, The Netherlands

7. Department of Pediatrics, Emma Children's Hospital, Amsterdam University Medical Centers, Amsterdam, The Netherlands

9. Department of Clinical Chemistry, Amsterdam University Medical Centers, location VU Medical Centre, Amsterdam, The Netherlands

8. Department of Physics, Chemistry and Pharmacy, University of Southern Denmark, Odense, Denmark

10. Division of Pediatric Neurology, Washington University School of Medicine, St. Louis, MO USA

11. Departments of Neurology and Pediatrics, University of Washington, Seattle, WA USA, and Department of Pediatrics, Duke University, Durham, NC USA

12. Division of Clinical and Metabolic Genetics, Department of Pediatrics, University of Toronto, Toronto, Ontario, Canada

13. Department of Medical Genetics, University of Alberta, Edmonton, Alberta, Canada

14. Medical Neurogenetics Laboratories, Atlanta, Georgia, USA

## Supplemental Information Engelke et al.

15. Department of Pediatric Neurology, Radboud University Medical Centre, Nijmegen, The Netherlands
16. Department of Pediatrics, Máxima Medical Centre, Veldhoven, The Netherlands
17. Department of Pediatrics-Metabolic Diseases, Radboud Center for Mitochondrial Medicine, Radboud University Medical Center, Nijmegen, The Netherlands.
18. United for Metabolic Diseases (UMD), The Netherlands
19. Van't Hoff Institute for Molecular Sciences, University of Amsterdam, Amsterdam, The Netherlands

**Supplemental Table 1.** XCMS online parameter settings.

| <b>Parameter group</b>           | <b>Parameter</b> | <b>Setting</b> |
|----------------------------------|------------------|----------------|
| <i>Feature detection</i>         | ppm              | 15             |
|                                  | min peak width   | 5              |
|                                  | max peak width   | 10             |
| <i>Alignment</i>                 | min frac         | 0.1            |
|                                  | bw               | 3              |
|                                  | m/z width        | 0.015          |
| <i>Retention time correction</i> | method           | Obiwarp        |
|                                  | profStep         | 1              |

**Supplemental Figure 1.** Correlation of quantitative concentrations of 6-oxoPIP and 2-OPP in plasma (X-axis) with normalized NGMS intensity values (Y-axis, relative units).  $R^2$  from linear regression is shown.

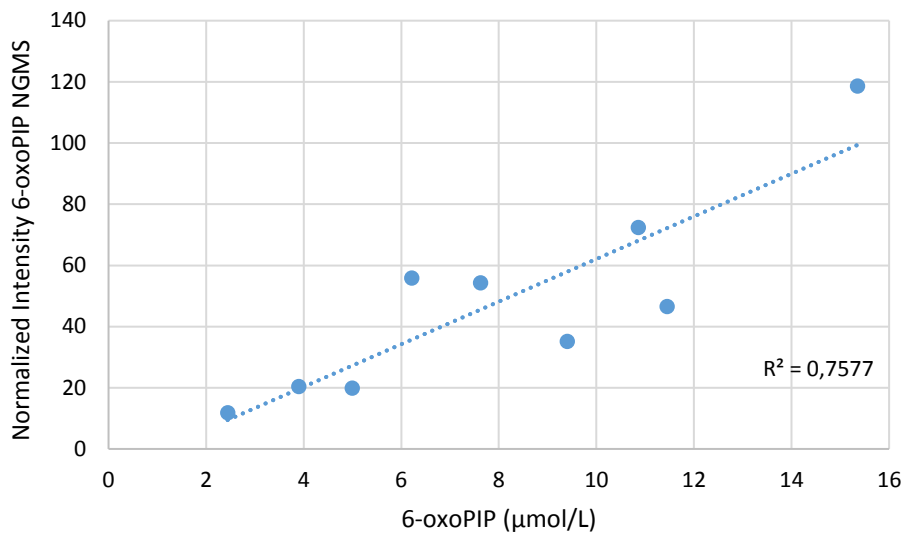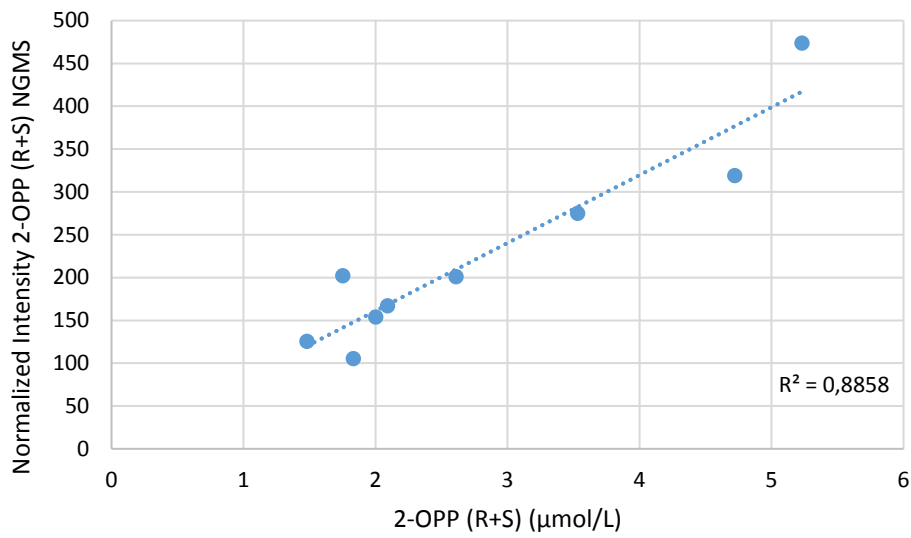

**Supplemental Figure 2.** Within-sample correlation for 2-OPP and 6-oxoPIP levels in urine, plasma and CSF of PDE-ALDH7A1 patients. While for urine, there appeared to be a positive correlation between 2-OPP and 6-oxoPIP levels, in plasma and CSF this was not clear. Different treatment regimens in patients are coded as follows: open circles: untreated; filled squares: vitamin B6 supplementation; filled circles: vitamin B6 and arginine supplementation; filled triangles: vitamin B6 supplementation and lysine restriction; filled diamonds: vitamin B6 and arginine supplementation and lysine restriction; cross: therapy unknown.

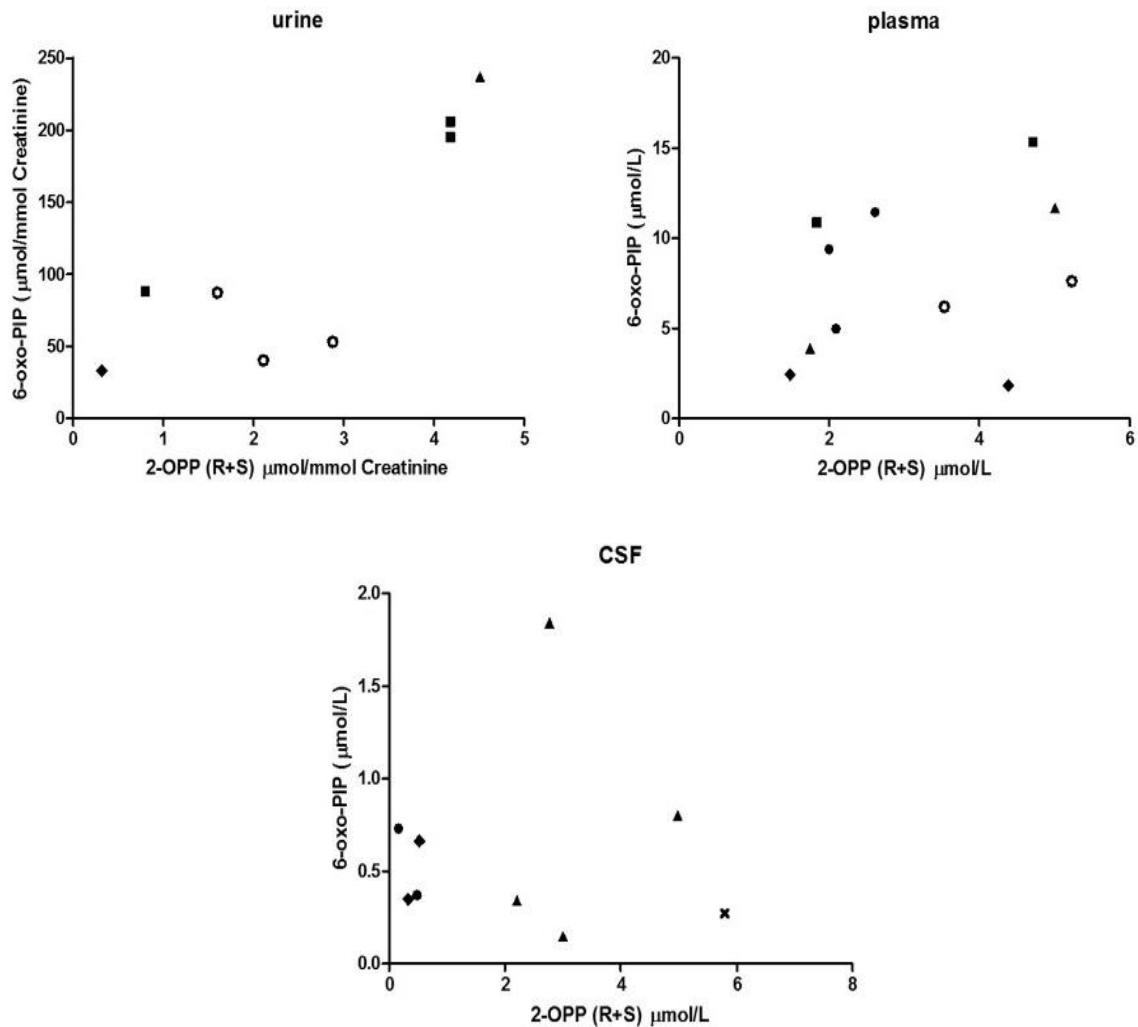

**Supplemental Figure 3.** Correlation of 6-oxoPIP and 2-OPP concentration to  $\alpha$ -AASA concentration in urine of PDE-ALDH7A1 patients.  $R^2$  from linear regression is shown.

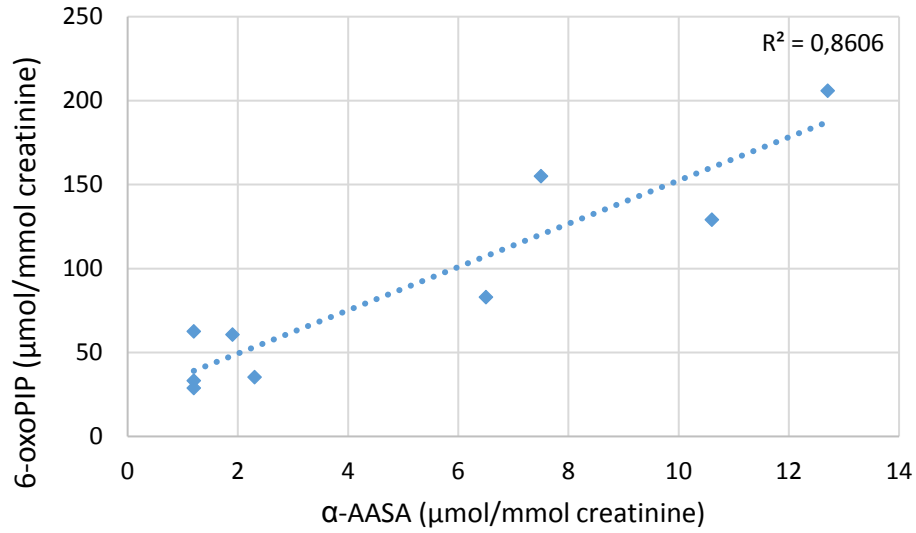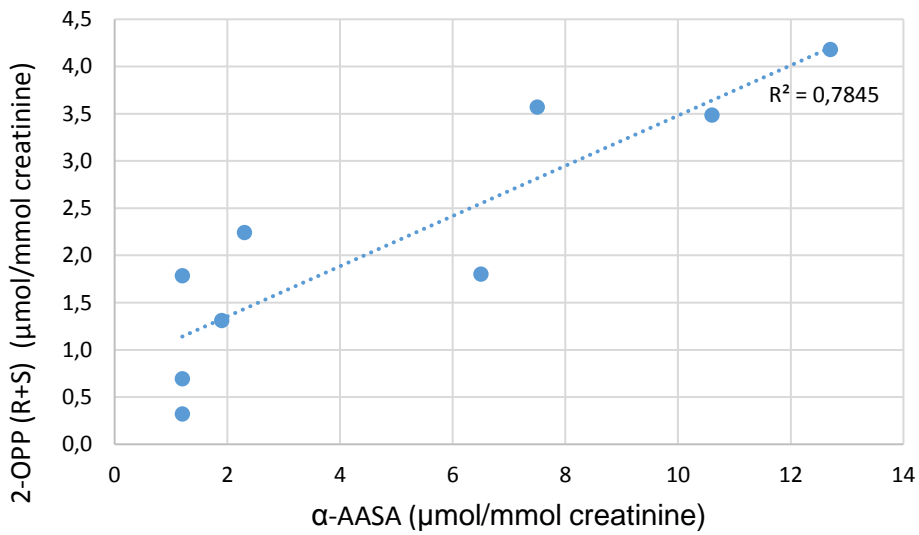

**Supplemental Figure 4.** (A) Overlay of IR spectra of the protonated 2S,6S-2-OPP ion measured from incubations of P6C and AcAc in plasma, urine, H<sub>2</sub>O and PBS, incubation of P6C in ketotic urine and from a solution of the synthetic reference standard. (B) Overlay of IR spectra of the protonated 2S,6R-2-OPP ion measured from incubations of P6C and AcAc in plasma and H<sub>2</sub>O and from a solution of the synthetic reference standard.

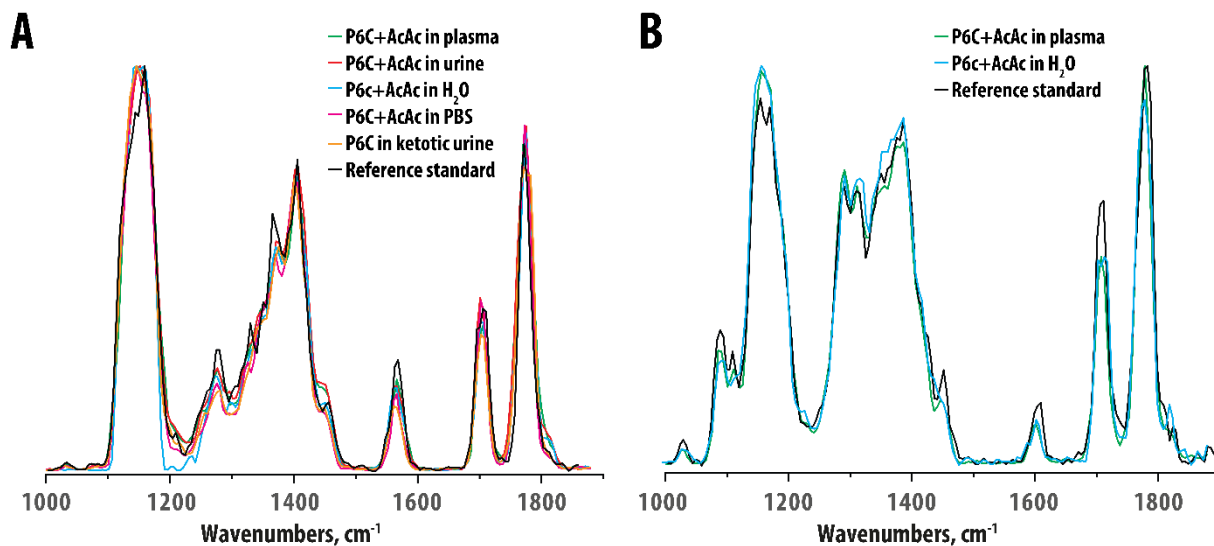

**Supplemental Figure 5.** Massive ketosis does not lead to false positive PDE-ALDH7A1 diagnosis based on 2-OPP levels in plasma. In plasma of 6 non-PDE-ALDH7A1 control individuals in massive ketosis, based on highly increased acetyl(C2)-carnitine concentrations (upper reference limit C2-carnitine is 9.0  $\mu\text{mol/L}$ ), no correlation between C2-carnitine levels (X-axis) and 2-OPP levels (Y-axis) could be detected. Also, 2-OPP levels remained far below the PDE-ALDH7A1 patient cut-off value of 1.0  $\mu\text{mol/L}$  (indicated as black line).

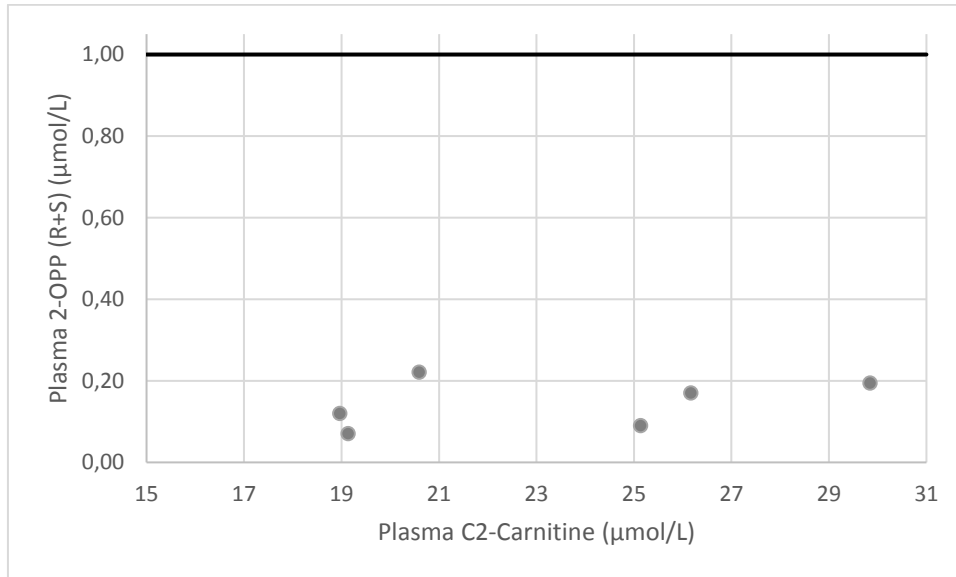



**Supplemental Figure 6.** Extracted ion chromatograms of 2S,6R-2-OPP (m/z 186.1123, RT 2.67 min) in full body lysates of zebrafish exposed to increasing concentrations of 2S,6R-2-OPP in the swimming water; (A) Negative control, H<sub>2</sub>O exposure, (B) 1  $\mu$ M, (C) 10  $\mu$ M, (D) 100  $\mu$ M, (E) 1 mM and (F) 10 mM 2-OPP exposure. Y-axis represents relative NGMS intensity, X-axis represents RT (min).

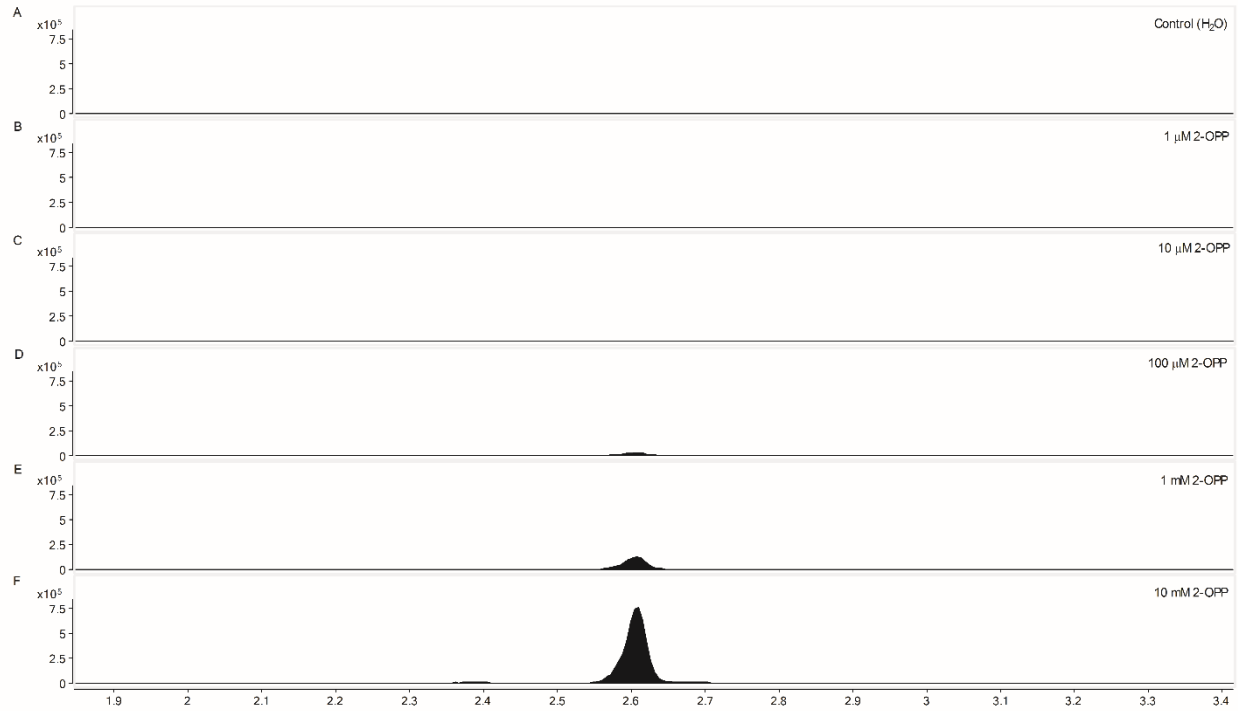

**Supplemental Figure 7.** Direct infusion MS results in DBS for 6-oxoPIP and 2-OPP, showing complete overlap between PDE patients and controls for 6-oxoPIP, but adequate distinction based on 2-OPP. Y-axis shows intensity of 6-oxoPIP in the left figure and 2-OPP in the right figure. On the X-axis, the categories of non-PDE controls (controls, N=10) and PDE-ALDH7A1 patients (PDE, N=4) are plotted. Patient results are marked as follows: Stars: neonatal DBS, untreated patients; filled square: DBS from 10-year old patient on vitamin B6 supplementation; open circle: DBS from untreated 16-year old patient.

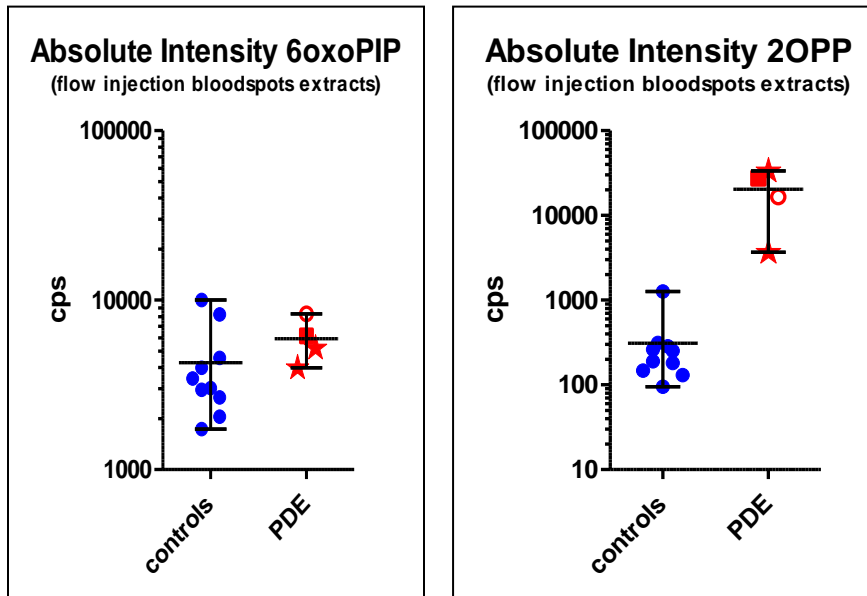

**Supplemental Figure 8.** Synthesis of 2-OPP, 1,3-<sup>13</sup>C<sub>2</sub>-(2*S*,6*R*)-2-OPP and <sup>13</sup>C<sub>1</sub>-6-oxoPIP; reagents (**1-14**) and reaction conditions (**a-m**): (**1**) α-amino adipic acid, (**2**) (S)-6-oxopiperidine-2-carboxylic-6-<sup>13</sup>C acid (6-oxoPIP), (**3**) tert-butyl acetoacetate, (**4**) acetoacetate, (**5**) allysine ethylene acetal, (**6**) (S)-2,3,4,5-tetrahydropyridine-2-carboxylic acid (P6C), (**7**) benzyl (2*S*)-1-benzyl-6-(2-oxo-propyl) piperidine-2-carboxylate, (**8**) (2*S*)-6-(2-oxopropyl)piperidine-2-carboxylic acid (2-OPP), (**9**) acetone-1,3-<sup>13</sup>C<sub>2</sub>, (**10**) tert-butyl dimethyl(prop-1-en-2-yloxy)silane <sup>13</sup>C<sub>2</sub>, (**11**) benzyl 2-(((benzyloxy)carbonyl)amino)-5-(1,3-dioxolan-2-yl)pentanoate, (**12**) (S)-1-(((benzyloxy)carbonyl)-1,2,3,4-tetrahydropyridine-2-carboxylic acid, (**13**) dibenzyl (2*S*)-6-(2-oxopropyl-1,3-<sup>13</sup>C<sub>2</sub>)piperidine-1,2-dicarboxylate, (**14**) (2*S*)-6-(2-oxopropyl-1,3-<sup>13</sup>C<sub>2</sub>)piperidine-2-carboxylic acid, (**a**) AcOH, 120 °C, 95%; (**b**) TFA, DCM, 96%; (**c**) 1M HCl, quant; (**d**) H<sub>2</sub>O (pH 6-7); (**e**) BnBr, K<sub>2</sub>CO<sub>3</sub>, DMF, 40% over two steps; (**f**) H<sub>2</sub>, Pd/C, ACN, 54%; (**g**) TBDMSOTf, 0 °C, DCM, 92%; (**h**) CbzOsu, NaHCO<sub>3</sub>, dioxane/H<sub>2</sub>O; (**i**) BnBr, K<sub>2</sub>CO<sub>3</sub>, DMF, 85% over two steps; (**j**) *p*-TsOH, DMF, toluene, 115 °C, 94%; (**k**) AcCl, MeOH, 99%; (**l**) Sn(OTf)<sub>2</sub>, MeCN, -30 °C to room temperature, 79%; (**m**) H<sub>2</sub>, Pd/C, MeOH/H<sub>2</sub>O, 76%. The \* denotes the position of the <sup>13</sup>C isotope label. Please refer to supplemental methods for detailed description of synthesis.

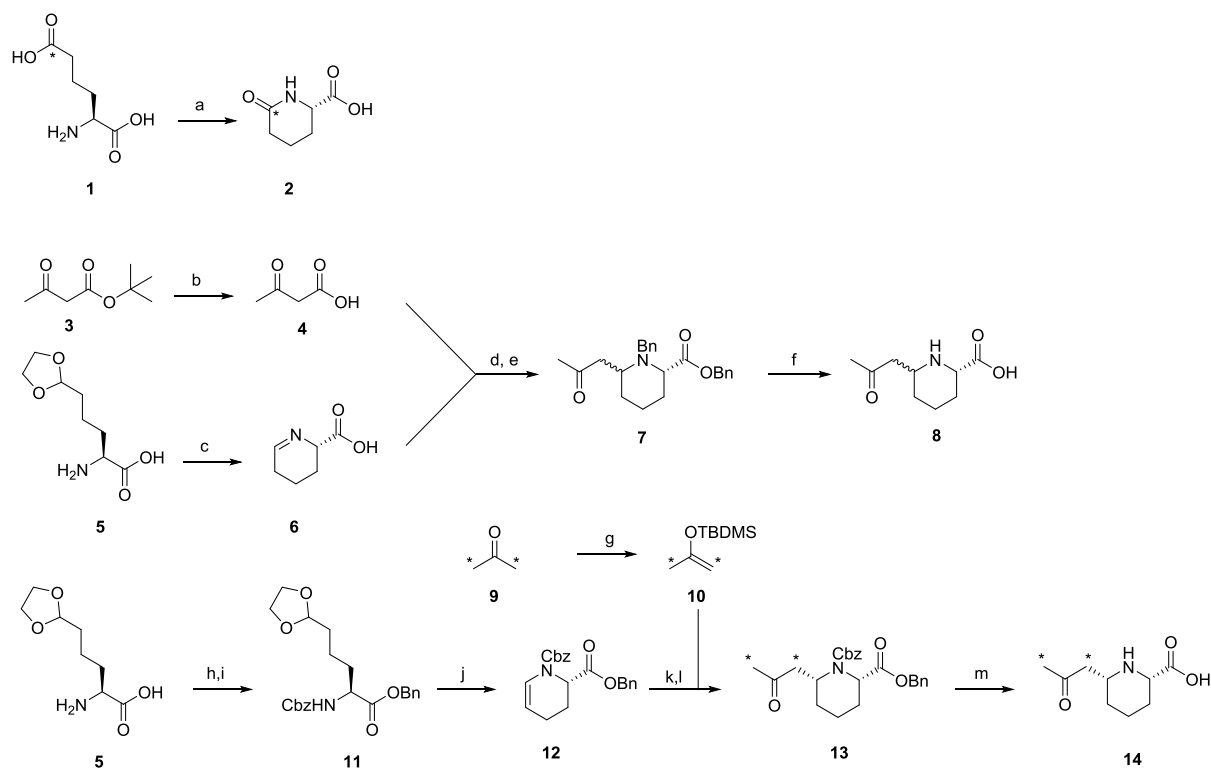

**Supplemental Figure 9.**  $^1\text{H}$  and  $^{13}\text{C}$  NMR spectra of compounds 2, 7, 8 and 10-14 as shown in Supplemental Figure 7. For further details on NMR spectra, please refer to Supplemental Methods, which are described below.

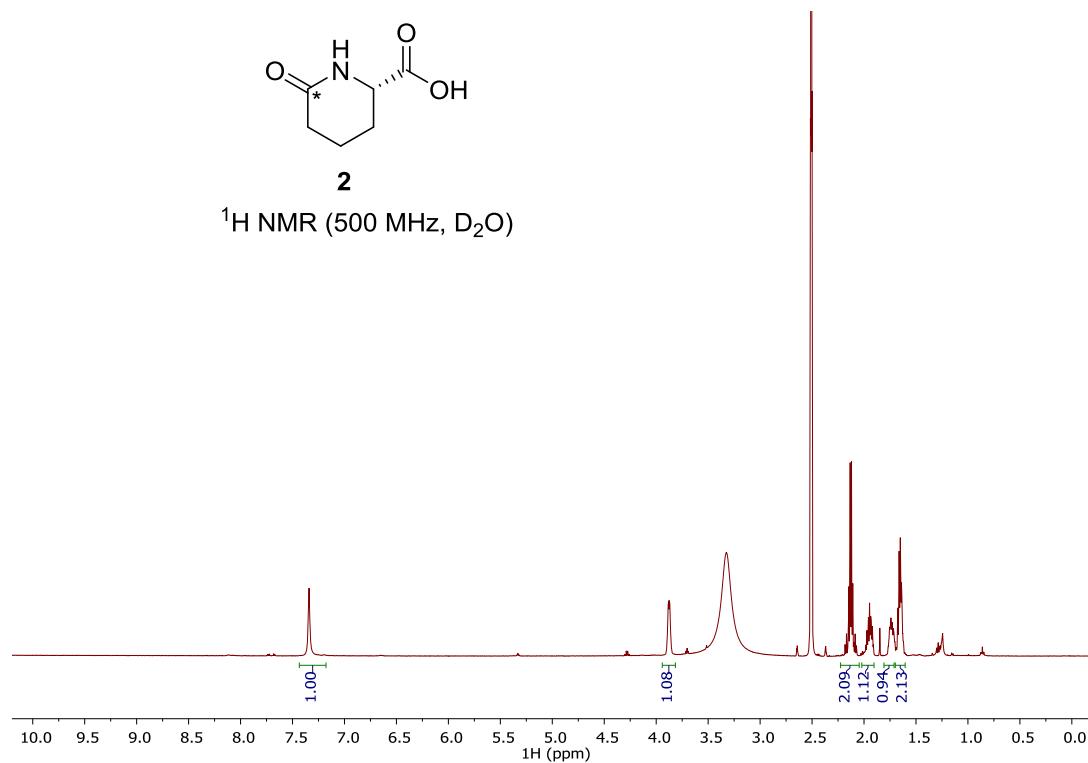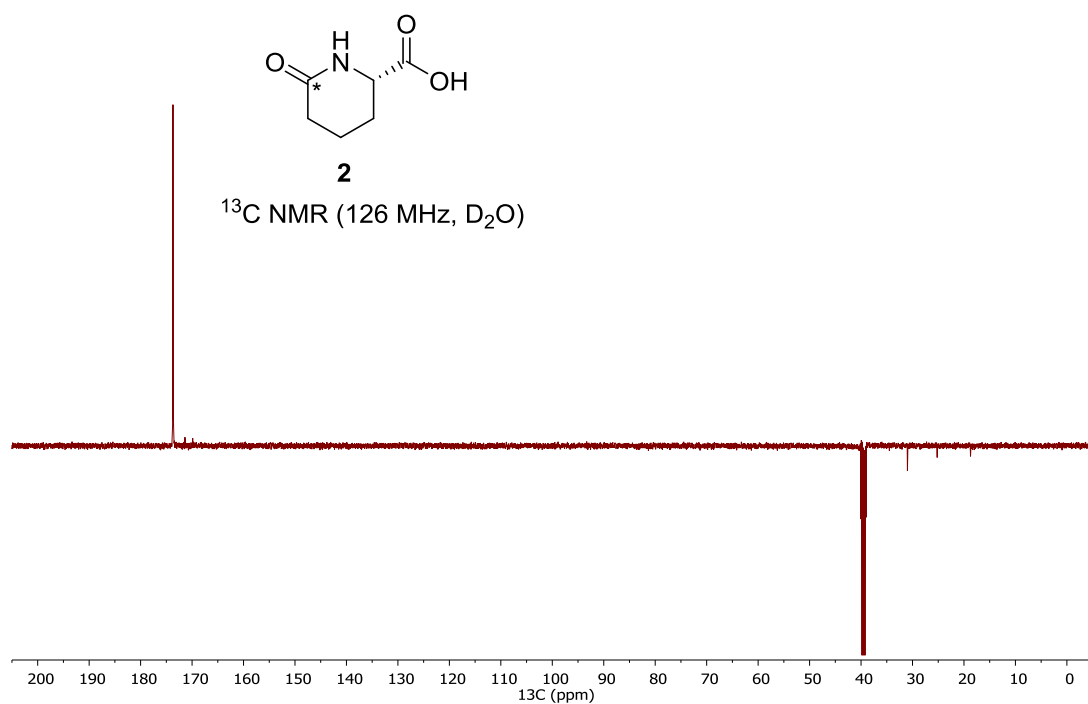

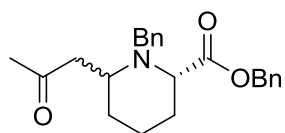

7

<sup>1</sup>H NMR (400 MHz, Chloroform-d)

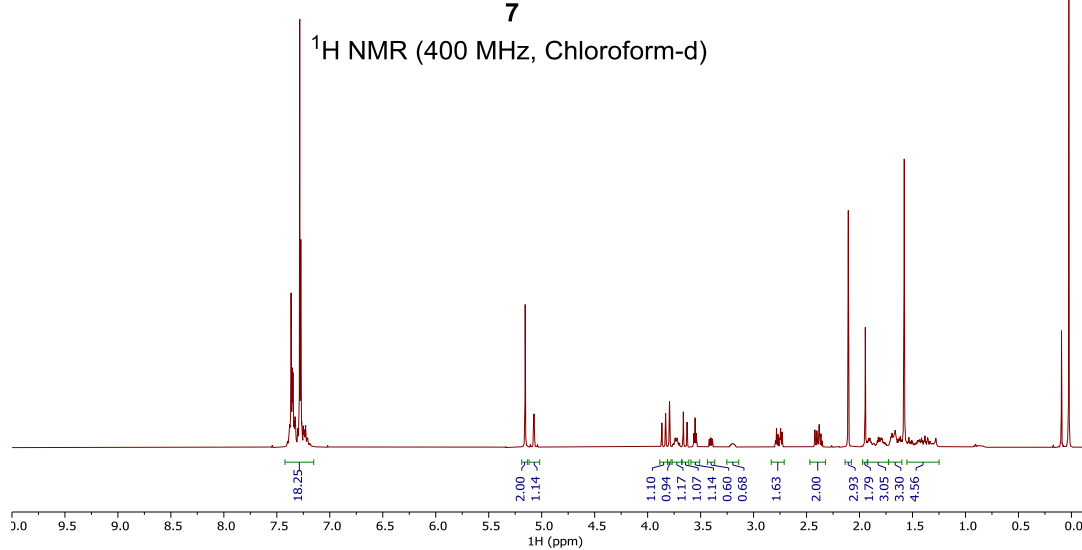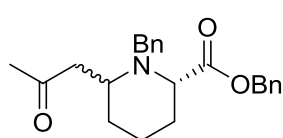

7

<sup>13</sup>C NMR (126 MHz, Chloroform-d)

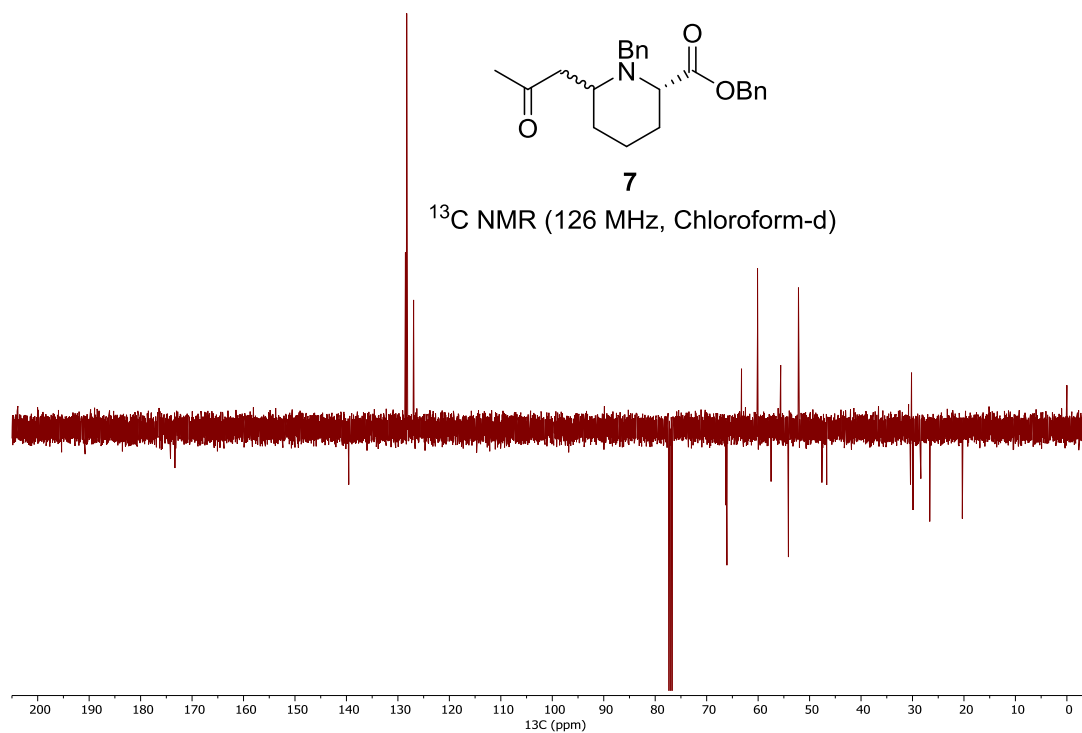

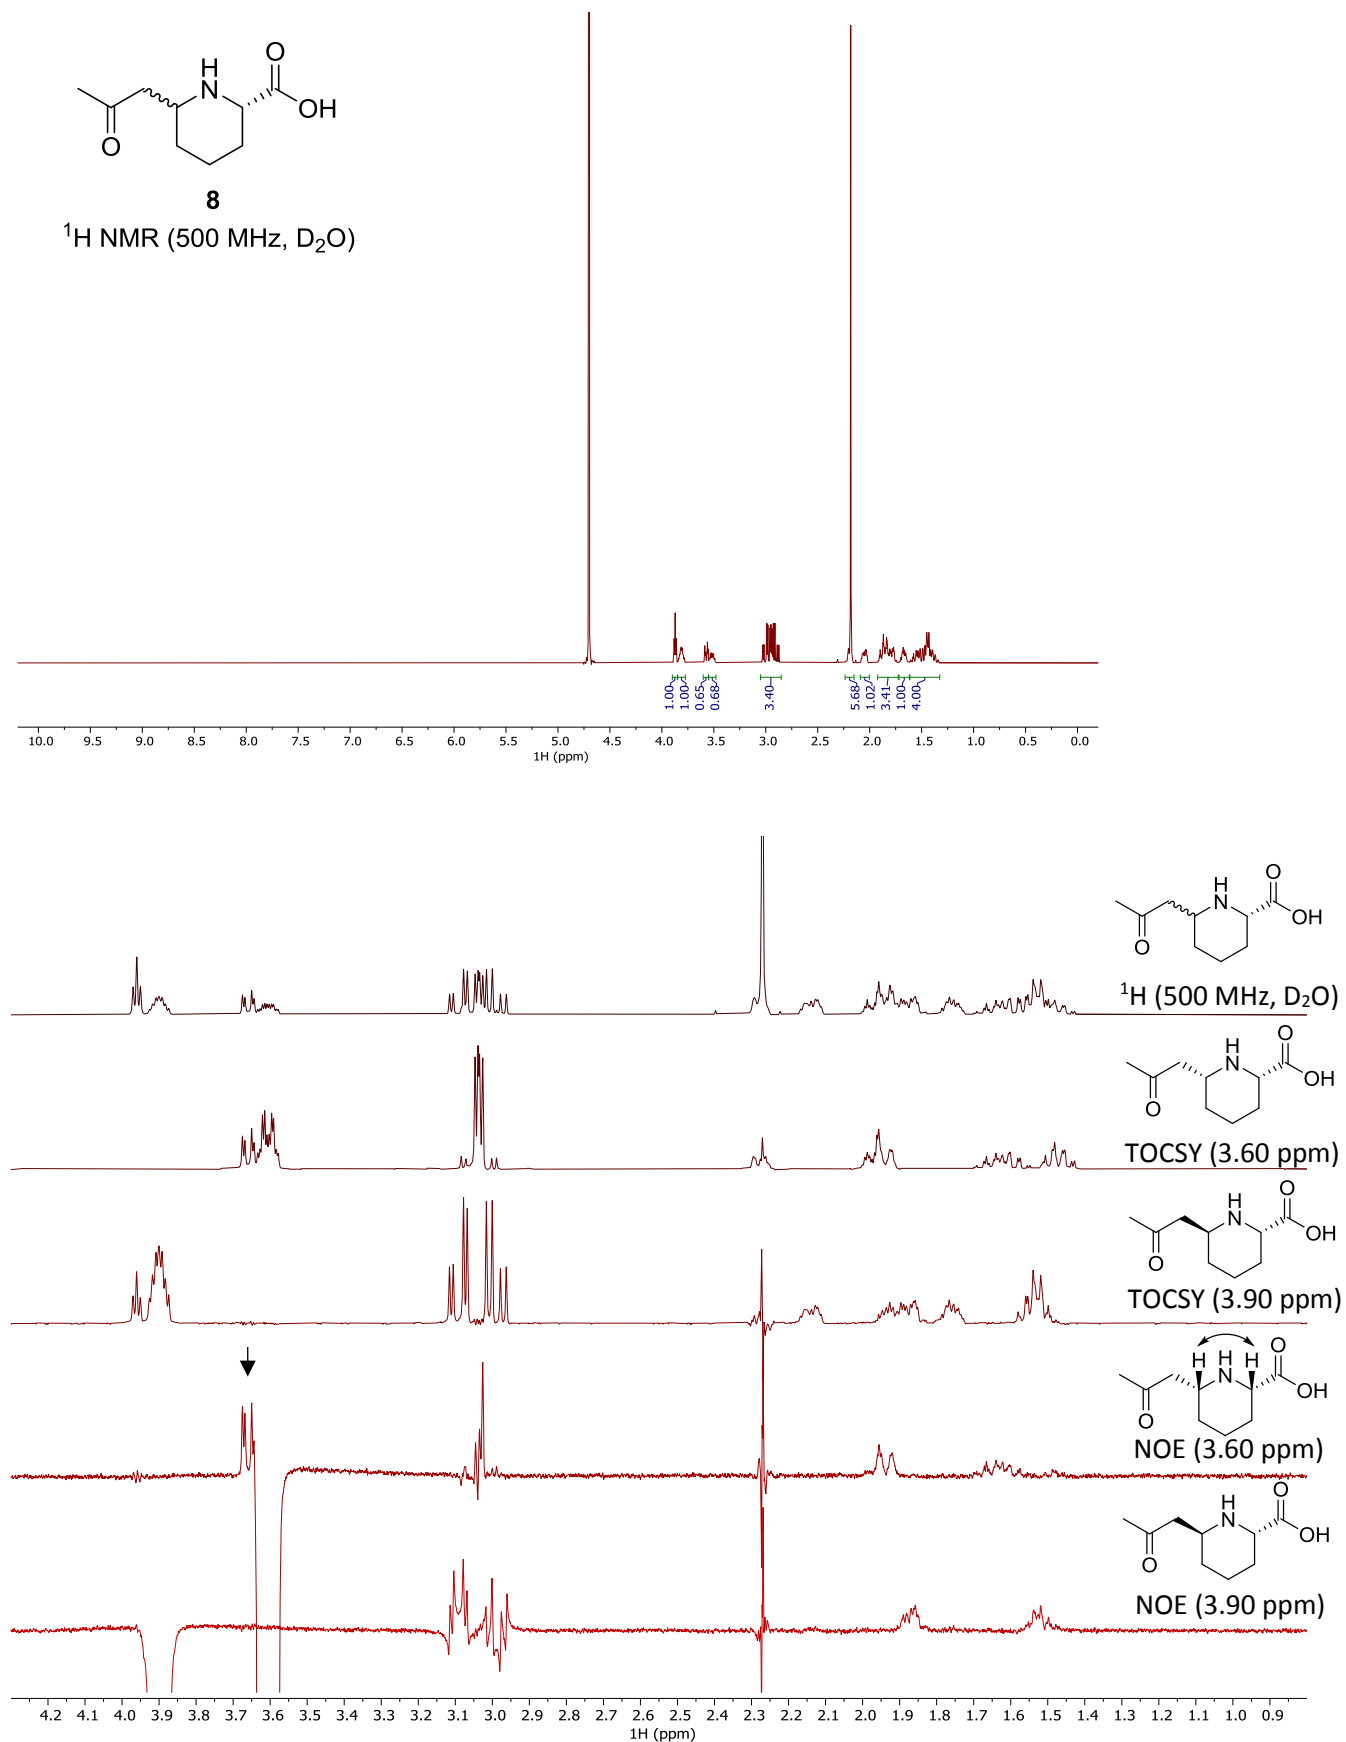

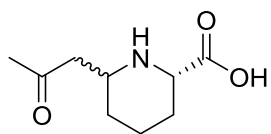

**8**

$^{13}\text{C}$  NMR (126 MHz,  $\text{D}_2\text{O}$ )

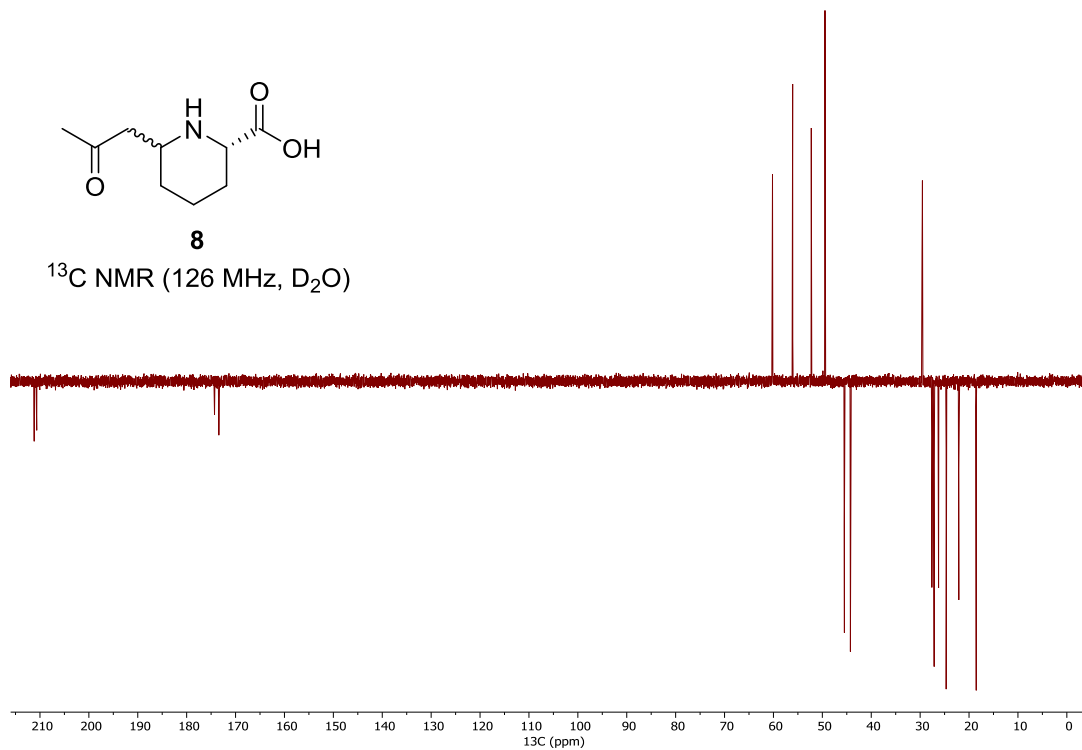

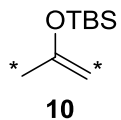

$^1\text{H}$  NMR (500 MHz, Chloroform-d)

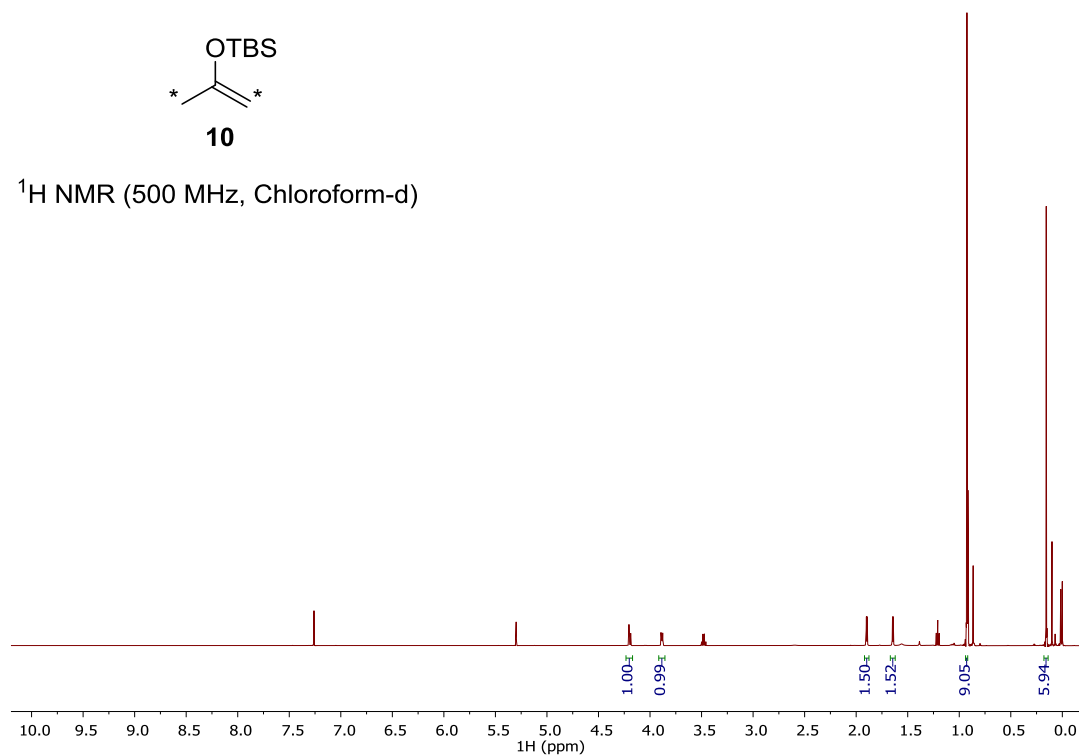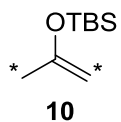

$^{13}\text{C}$  NMR (126 MHz, Chloroform-d)

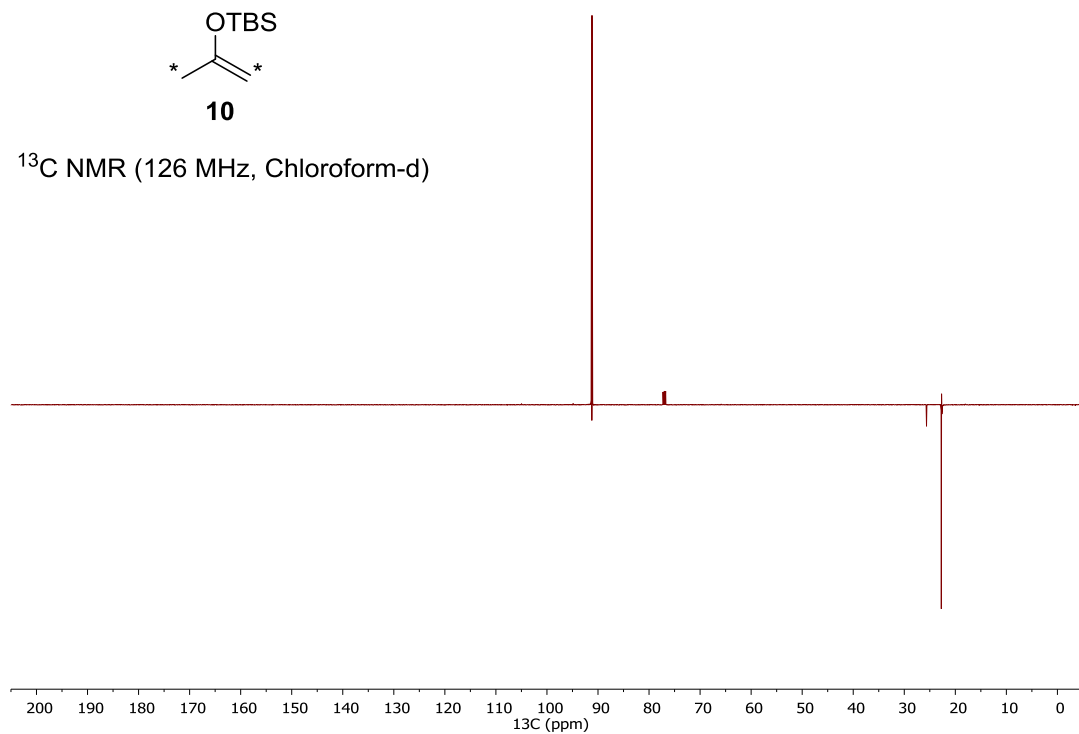



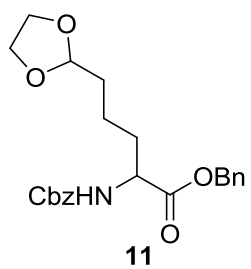

$^1\text{H}$  NMR (500 MHz, DMSO- $d_6$ )

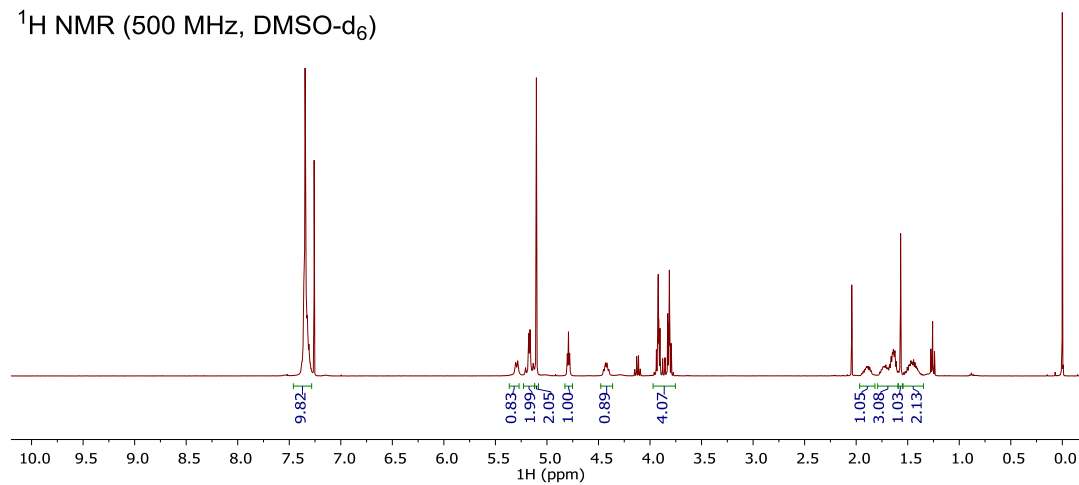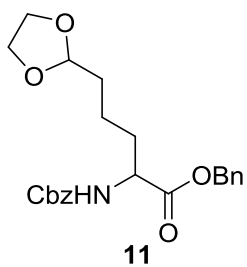

$^{13}\text{C}$  NMR (126 MHz, DMSO- $d_6$ )

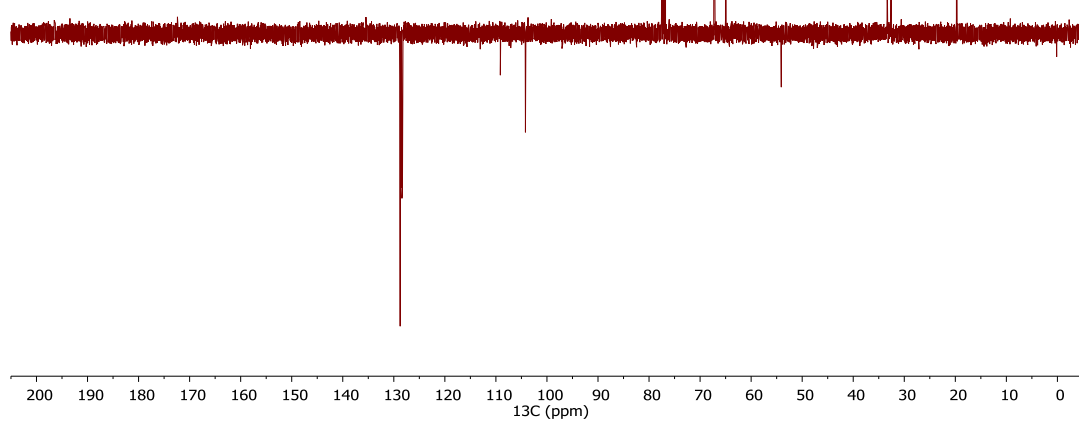

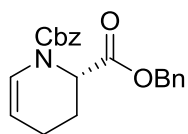

**12**

<sup>1</sup>H NMR (500 MHz, DMSO-d<sub>6</sub>)

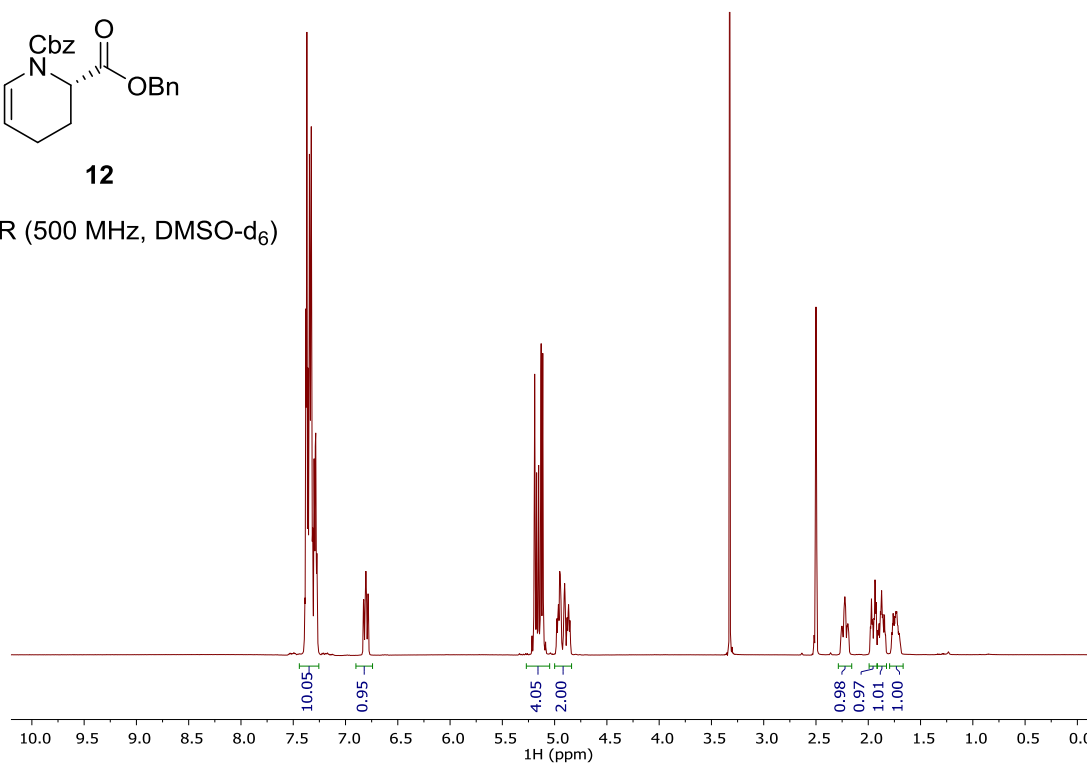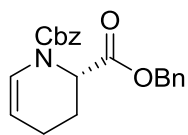

**12**

<sup>13</sup>C NMR (126 MHz, DMSO-d<sub>6</sub>)

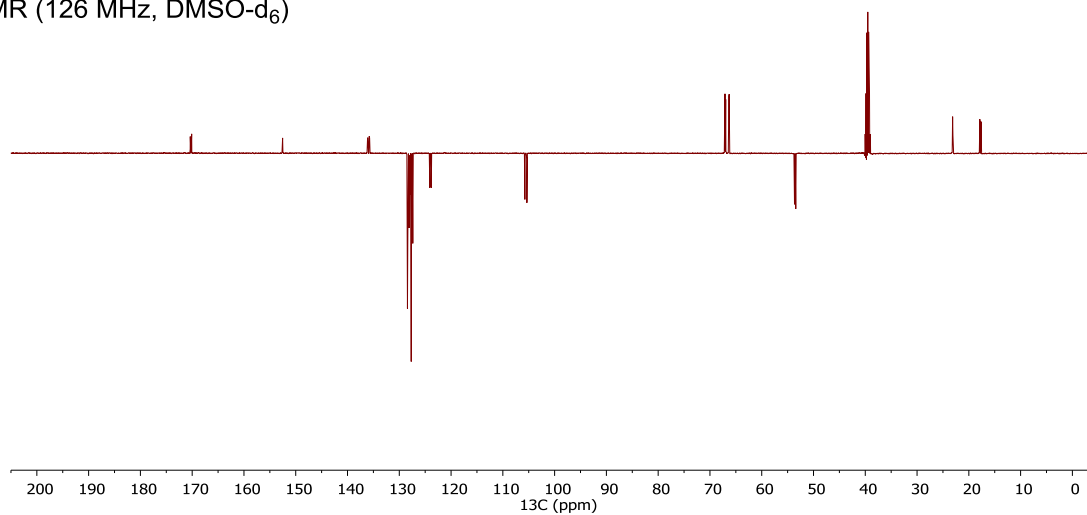

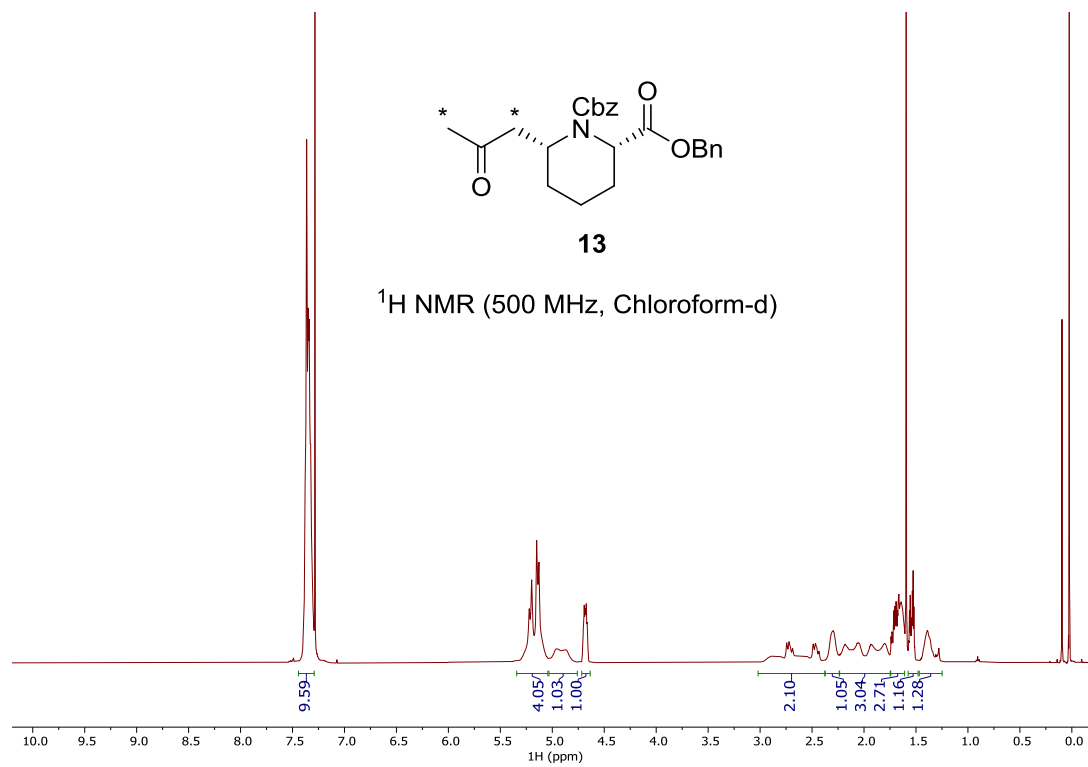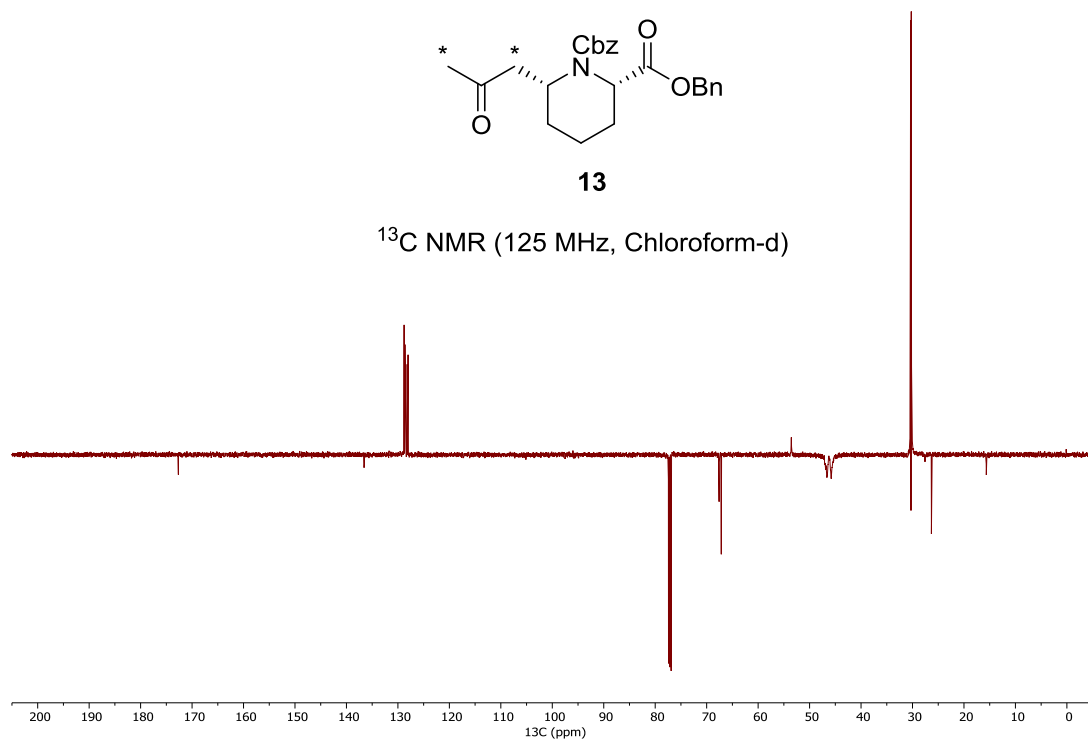

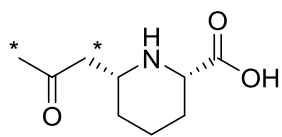

**14**

$^1\text{H}$  NMR (500 MHz,  $\text{D}_2\text{O}$ )

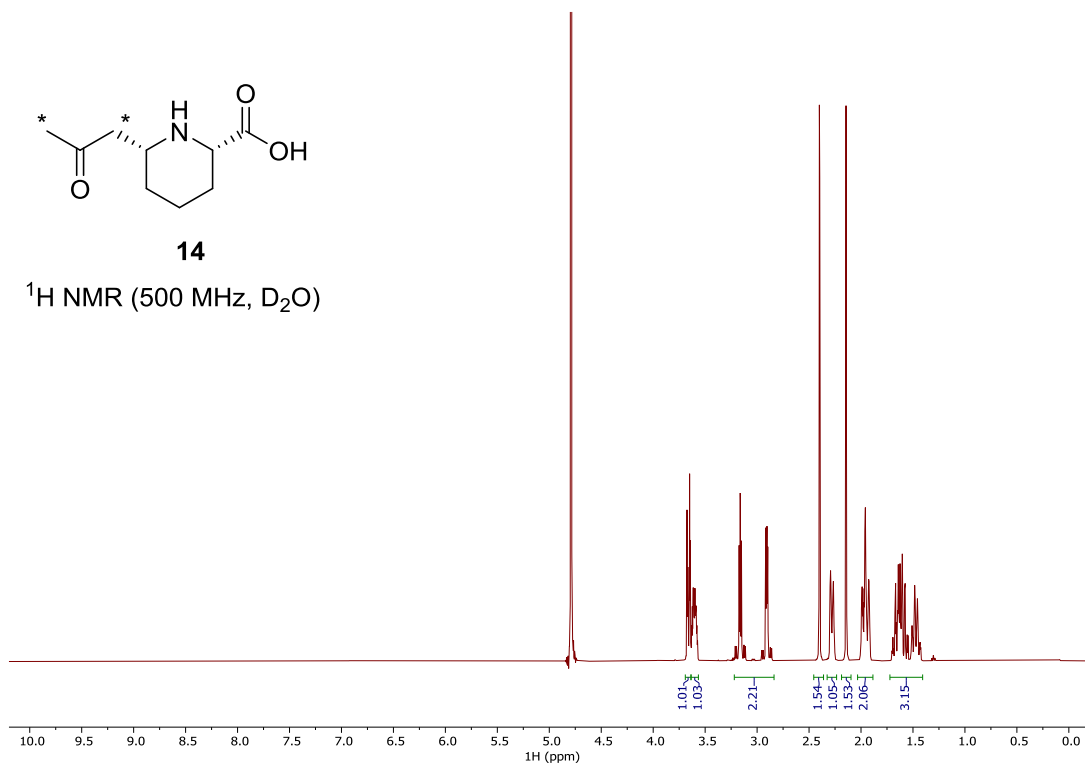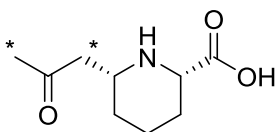

**14**

$^{13}\text{C}$  NMR (126 MHz,  $\text{D}_2\text{O}$ )

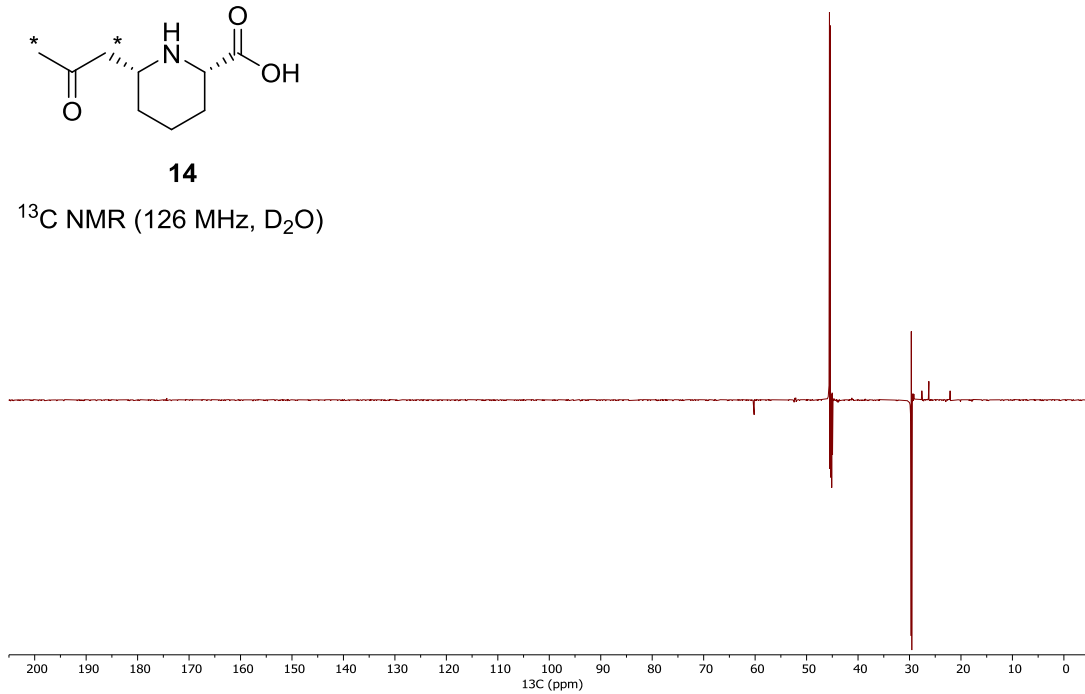

## Supplemental Methods

### <sup>1</sup>H and <sup>13</sup>C NMR spectra and (LC) MS measurements in model compound synthesis

<sup>1</sup>H and <sup>13</sup>C NMR spectra (Supplemental Figure 9) were recorded on a Bruker AVANCE III (500 MHz <sup>1</sup>H, 125 MHz <sup>13</sup>C) or) equipped with a Bruker Prodigy BB cryoprobe or a Bruker AVANCE III (400 MHz <sup>1</sup>H, 100 MHz <sup>13</sup>C) in the solvent indicated at room temperature (RT). Chemical shifts are reported in  $\delta$  (ppm) units relative to the internal reference tetramethylsilane (Me<sub>4</sub>Si). For <sup>1</sup>H NMR spectra, the following abbreviations are used to describe multiplicities: s (singlet), d (doublet), t (triplet), bs (broad singlet), dd (double doublet), and m (multiplet). Coupling constants are reported in Hertz (Hz) as a *J* value, for <sup>13</sup>C labelled compounds a distinction is made between <sup>1</sup>J and <sup>3</sup>J couplings. Mass spectra were recorded on Thermo Finnigan LCQ Advantage Max. LC-MS was carried out on a Shimadzu LCMS-QP8000 (Duisburg, Germany) single quadrupole bench-top mass spectrometer operating in a positive ionization mode. The scanning range was *m/z* 50-2000. A gradient of MeCN/H<sub>2</sub>O containing 0.1 % formic acid was used. Samples were injected using a flow rate of 0.2 mL/min and eluted with 5-100 % in 50 min, infused in the Electrospray system. All compounds were routinely checked by TLC on Kieselgel 60 F254 (Merck, Darmstadt, Germany); spots were visualized under UV light (254 nm) and were stained with ninhydrin, 2-4-nitrophenylhydrazine (DNP), Cerium Molybdate Stain or aqueous KMnO<sub>4</sub> (depending on the reaction), followed by heating on a hot plate. R<sub>f</sub> values were obtained with the indicated solvent mixtures. All solvents were reagent grade and, when necessary, were purified and dried by standard methods. Organic solutions were dried over anhydrous sodium sulfate and anhydrous magnesium sulfate. The yields of the samples were calculated after drying the samples under high vacuum overnight or after lyophilization. All commercially purchased reagents were used without further purification as delivered from the corresponding companies. (*S*)-2-Aminohexanedioic-6-<sup>13</sup>C acid, *tert*-butylacetoacetate, Sn(OTf)<sub>2</sub> and acetone-1,3-<sup>13</sup>C<sub>2</sub> were obtained from Sigma Aldrich. Allylsine ethylene acetal was obtained from Chiralix. TBDMSOTf and CbzOSU were obtained from Fluorochem.

Detailed information on synthesis as shown in Supplemental Figure 8, and characteristics for NMR spectra as shown in Supplemental Figure 9.

Numbers in brackets refer to compounds as shown in Supplemental Figure 7. Superscript numbers in parentheses refer to Supplemental References.

**(S)-6-Oxopiperidine-2-carboxylic-6-<sup>13</sup>C acid [2]** <sup>(1)</sup>

(S)-2-Aminohexanedioic-6-<sup>13</sup>C acid (2.15 mg, 13.3  $\mu$ mol) was dissolved in AcOH (200  $\mu$ L) and refluxed for 6 h. The solution was cooled to RT, concentrated under reduced pressure, dissolved in water and lyophilized to obtain 1.81 mg of **2** (12.6  $\mu$ mol, 95%) as a white solid. <sup>1</sup>H NMR (500 MHz, DMSO-d<sub>6</sub>)  $\delta$  7.34 (s, 1H), 3.88 (qd, *J* = 5.6, 2.3 Hz, 1H), 2.19 – 2.06 (m, 2H), 2.03 – 1.89 (m, 1H), 1.78 – 1.70 (m, 1H), 1.69 – 1.59 (m, 2H); <sup>13</sup>C NMR (126 MHz, DMSO-d<sub>6</sub>)  $\delta$  173.7, 55.0, 31.0, 25.2, 18.7.

**Acetoacetic acid [4]** <sup>(2)</sup>

TFA (15 mL, 190 mmol) was added to an ice-cold solution of *tert*-butylacetoacetate (10 mL, 61 mmol) in DCM (15 mL). The solution was allowed to warm up after 5 min and continuously stirred for 1 h. The solution was concentrated *in vacuo* to obtain 6.0 g of acetoacetic acid in 96% yield (59 mmol), used as is without further purification. *R*<sub>F</sub> = 0.30 (1:1, EtOAc:heptane).

**(S)-2,3,4,5-Tetrahydropyridine-2-carboxylic acid, P6C [6]**

For the incubations: To a suspension of allysine ethylene acetal (200 mg) in water (5 mL) was added 800 mg Amberlyst-15. After complete conversion the Amberlyst resin was washed with water (2 x 5 mL), subsequently the P6C was eluted with 10 mL 25% ammonia solution and dried *in vacuo* at ambient temperature.<sup>(3)</sup> The resulting solid was reconstituted to a 1 mM solution used in the incubations. For synthesis: allysine ethylene acetal (4.0 g) was dissolved in 1 M HCl (42 mL). After complete conversion the resulting solution was used as is for the synthesis of **7**.

**Benzyl (2S)-1-benzyl-6-(2-oxopropyl)piperidine-2-carboxylate [7]**

A solution of acetoacetic acid (**4**) (6.0 g, 59 mmol) in water (20 mL) was neutralized to pH 7 with solid NaOH. The acidic solution of **6** was added dropwise to the mixture while keeping the pH between 6 and 7 with addition of 1 M NaOH. After the solution (pH = 6.5) was stirred overnight it was refluxed for 30 min and subsequently concentrated *in vacuo*. Hot filtration with ethanol resulted in 3.9 g of a crude mixture containing **8**.<sup>(4)</sup> To facilitate purification, the residue was derivatized. The resulting residue was redissolved in DMF (60 mL) and cooled to 0 °C. Solid K<sub>2</sub>CO<sub>3</sub> (15 g, 11 mmol) was added followed by the addition of BnBr (10 mL, 84 mmol). The resulting mixture was stirred overnight and concentrated *in vacuo*. The residue was taken up in EtOAc (50 mL), washed with water (10 mL) and brine (10 mL), dried over MgSO<sub>4</sub> and concentrated *in vacuo*. Purification by column chromatography (3% diethyl ether in toluene) yielded 3.2 g of a slightly red oil in 42% yield (21 mmol) of both stereoisomers in a ratio of 1:0.6 (cis:trans, assignment

of diastereomers based on NMR **8**).  $R_f = 0.29$  (1:3, EtOAc:heptane);  $^1\text{H}$  NMR (400 MHz,  $\text{CDCl}_3$ , both stereoisomers; integrals based on major stereoisomer)  $\delta$  7.50 – 7.03 (m, 18H), 5.13 (s, 2H), 5.05 (d,  $J = 2.1$  Hz, 1H), 3.82 (d,  $J = 14.3$  Hz, 1H), 3.77 (s, 1H), 3.75 – 3.67 (m, 1H), 3.62 (d,  $J = 14.3$  Hz, 1H), 3.53 (t,  $J = 4.8$  Hz, 1H), 3.38 (dd,  $J = 7.6, 4.3$  Hz, 0.6H), 3.17 (s, 0.6H), 2.79 – 2.68 (m, 1.6H), 2.42 – 2.31 (m, 2H), 2.08 (s, 3H), 1.92 (s, 1.8 H), 1.90 – 1.71 (m, 3H), 1.70 – 1.57 (m, 3H), 1.52 – 1.24 (m, 4.5H);  $^{13}\text{C}$  NMR (126 MHz, Chloroform-d)  $\delta$  174.6, 173.2, 139.6, 128.5, 128.4, 128.30, 128.29, 128.23, 128.21, 128.17, 66.3, 66.1, 63.2, 60.1, 57.5, 55.6, 54.1, 52.2, 47.6, 46.7, 30.4, 30.2, 29.9, 28.4, 26.0, 20.32, 20.26; HRMS (ESI+); calcd for  $\text{C}_{23}\text{H}_{28}\text{NO}_3$  ( $M+\text{H}^+$ ): 366.2069, found 366.2081.

### **(2S)-6-(2-Oxopropyl)piperidine-2-carboxylic acid [8, 2-OPP]**

A solution of **7** (623 mg, 1.70 mmol) in MeCN (10 mL) was purged with argon. Pd/C (181 mg, 0.17 mmol) was added and the atmosphere was exchanged to  $\text{H}_2$ . After almost complete conversion ( $\sim 1.5$  h) the mixture was filtered over celite and concentrated *in vacuo*. The residue was purified by chromatography on Iatro beads (0  $\rightarrow$  40% MeOH in DCM) to yield 172 mg of an off white solid (55%, 0.93 mmol).  $^1\text{H}$  NMR (500 MHz,  $\text{D}_2\text{O}$ , both diastereoisomers; integrals based on major stereoisomer)  $\delta$  3.96 (t,  $J = 5.0$  Hz, 1H), 3.94 – 3.85 (m, 1H), 3.66 (dd,  $J = 12.5, 3.3$  Hz, 0.65H), 3.61 (dtd,  $J = 12.3, 6.3, 2.9$  Hz, 0.65H), 3.13 – 2.92 (m, 3.4H), 2.27 (s, 5.7H), 2.18 – 2.09 (m, 1H), 2.03 – 1.82 (m, 3.4H), 1.80 – 1.71 (m, 1H), 1.70 – 1.39 (m, 4H);  $^{13}\text{C}$  NMR (126 MHz,  $\text{D}_2\text{O}$ , both stereoisomers)  $\delta$  211.9, 210.7, 174.3, 173.4, 60.2, 56.1, 52.3, 49.5, 45.5, 44.3, 29.6, 29.5, 27.6, 27.1, 26.2, 24.7, 22.1, 18.5; HRMS (ESI+); calcd for  $\text{C}_9\text{H}_{16}\text{NO}_3$  ( $M+\text{H}^+$ ): 186.1130, found 186.1130.

### **tert-Butyldimethyl(prop-1-en-2-yloxy)silane $^{13}\text{C}_2$ [10] <sup>(5)</sup>**

A flame dried flask was charged with dry DCM (10 ml) and acetone-1,3- $^{13}\text{C}_2$  (200 mg, 3.33 mmol). The solution was cooled with an ice-bath and TEA (550  $\mu\text{L}$ , 4.00 mmol) was added. After 1 h at RT, the solution was cooled with an ice-bath and TBDMSOTf (841  $\mu\text{L}$ , 3.66 mmol) was added dropwise. After stirring at RT for 4 h, the reaction was quenched with cold sat. aq.  $\text{NH}_4\text{Cl}$  (5 mL). The mixture was extracted with  $\text{Et}_2\text{O}$  (15 mL), dried over  $\text{MgSO}_4$  and concentrated under reduced pressure. The resulting non-viscous clear liquid was separated by means of pipet from the solids and viscous red oil resulting in 530 mg of **10** (3.06 mmol) in 92% yield.  $^1\text{H}$  NMR (500 MHz, chloroform-d)  $\delta$  4.24 – 4.20 (m, 1H), 3.93 – 3.90 (m, 1H), 1.77 (ddd,  $^1J_{\text{CH}} = 126.7$  Hz,  $^3J = 3.9, 0.9$  Hz, 3H), 0.95 (s, 9H), 0.18 (s, 6H);  $^{13}\text{C}$  NMR (126 MHz, Chloroform-d)  $\delta$  91.3, 91.2, 25.7, 22.8, 22.7, -4.6.

**Benzyl 2-(((benzyloxy)carbonyl)amino)-5-(1,3-dioxolan-2-yl)pentanoate [11]** <sup>(6)</sup>

A suspension of (*S*)-2-amino-5-(1,3-dioxolan-2-yl)pentanoic acid (2.00 g, 10.6 mmol) in dioxane/water (10 mL, 1:1) was cooled with an ice bath and subsequently NaOH (444 mg, 11.1 mmol), NaHCO<sub>3</sub> (1.33 g, 15.9 mmol) and CbzOSu (2.69 g, 10.8 mmol) were added. After stirring overnight, dioxane was removed under reduced pressure. The resulting solution was diluted with a 2.5% NaHCO<sub>3</sub> solution (100 mL) and washed with Et<sub>2</sub>O (3 x 25 mL). The basic aqueous layer was acidified with 6M HCl solution until precipitation was observed (pH ~ 3). The resulting precipitate was extracted with EtOAc (3 x 50 mL), dried over MgSO<sub>4</sub> and concentrated under reduced pressure. The resulting transparent oil was dissolved in dry DMF (20 mL) and cooled with an ice bath. Subsequently K<sub>2</sub>CO<sub>3</sub> (1.53 g, 11.1 mmol) and BnBr (1.88 mL, 15.9 mmol) were added. The reaction mixture was stirred overnight at RT. After complete conversion water (100 mL) was added followed by extraction with EtOAc (3 x 50 mL). The organic layer was washed with brine (50 mL), dried over MgSO<sub>4</sub> and concentrated under reduced pressure. The resulting residue was purified by column chromatography (heptane:EtOAc = 2:1) to yield 4.03 g of a transparent oil (10.6 mmol, 85%). *R*<sub>F</sub> = 0.29 (1:3, EtOAc:heptane); <sup>1</sup>H NMR (400 MHz, Chloroform-*d*) δ 7.39 – 7.28 (m, 10H), 5.29 (d, *J* = 8.2 Hz, 1H), 5.24 – 5.13 (m, 2H), 5.10 (s, 2H), 4.79 (t, *J* = 4.6 Hz, 1H), 4.43 (q, *J* = 7.7, 7.1 Hz, 1H), 3.98 – 3.75 (m, 4H), 1.97 – 1.83 (m, 1H), 1.79 – 1.60 (m, 3H), 1.47 (m, 2H); <sup>13</sup>C NMR (126 MHz, Chloroform-*d*) δ 128.8, 128.7, 128.6, 128.4, 128.3, 128.2, 104.2, 67.3, 67.1, 65.01, 65.00, 54.1, 33.4, 32.6, 19.8; HRMS (ESI<sup>+</sup>): calcd for C<sub>32</sub>H<sub>27</sub>NNaO<sub>6</sub> (*M*+Na<sup>+</sup>): 374.1368, found 374.1369

**(*S*)-1-((Benzyloxy)carbonyl)-1,2,3,4-tetrahydropyridine-2-carboxylic acid [12]** <sup>(6)</sup>

To a solution of **11** (2.60 g, 6.3 mmol) in toluene (25 mL) was added DMF (240 μL, 3.14 mmol) and *p*TsOH·H<sub>2</sub>O (120 mg 0.63 mmol). The solution was heated to reflux for 3 h. Upon complete conversion the reaction was cooled to RT, diluted with EtOAc (25 mL) and quenched with saturated aqueous NH<sub>4</sub>Cl (25 mL). The layers were separated and the organic layer was washed with sat. aq. NaHCO<sub>3</sub>, dried over MgSO<sub>4</sub> and concentrated under reduced pressure. The resulting residue was purified by column chromatography (EtOAc:heptane = 1:4) resulting in 2.10 g of a colorless oil in 94% yield (6.29 mmol). *R*<sub>F</sub> = 0.45 (1:3, EtOAc:heptane); <sup>1</sup>H NMR (500 MHz, DMSO-*d*<sub>6</sub>, rotamers) δ 7.40 – 7.24 (m, 10H), 6.84 – 6.76 (m, 1H), 5.23 – 5.06 (m, 4H), 5.01 – 4.81 (m, 2H), 2.34 – 2.16 (m, 1H), 1.95 (dt, *J* = 17.6, 5.7 Hz, 1H), 1.87 (dddd, *J* = 18.8, 10.1, 5.1, 2.1 Hz, 1H), 1.74 (m, 1H); <sup>13</sup>C NMR (126 MHz, chloroform-*d*, rotamers) δ 170.4, 170.1, 152.6, 152.5, 163.13, 136.07, 135.8, 135.7, 128.5, 128.42, 128.36, 128.10, 128.09, 128.07, 127.9, 127.71, 127.70, 127.4, 124.1, 123.8, 105.8, 105.4, 67.1, 67.0, 66.34, 66.29, 55.7, 55.4, 23.13, 12.08, 17.9, 17.7; HRMS (ESI<sup>+</sup>): calcd for C<sub>21</sub>H<sub>21</sub>NNaO<sub>4</sub> (*M*+Na<sup>+</sup>): 374.1368, found 374.1369.



**Dibenzyl (2S)-6-(2-oxopropyl-1,3-<sup>13</sup>C<sub>2</sub>)piperidine-1,2-dicarboxylate [13]**

To a solution of **12** (478 mg, 1.36 mmol) in dry MeOH (15 mL) was added AcCl (20  $\mu$ L, 0.27 mmol) at RT. After stirring for 1h, the solution was diluted with DCM (5 ml) and quenched with saturated aqueous NaHCO<sub>3</sub> (1 mL). The layers were separated and the organic layer was washed with brine (1 mL), dried over MgSO<sub>4</sub> and concentrated under reduced pressure. Without further purification the residue was dissolved in dry MeCN (15 mL), **10** (530 mg, 3.02 mmol) was added and the mixture was cooled to -30 °C. Sn(OTf)<sub>2</sub> (50.4 mg, 0.12 mmol) was added and the mixture was allowed to warm up to RT overnight. The mixture was dilute with EtOAc (50mL) and quenched with sat. aq. NaHCO<sub>3</sub> (1 mL). The layers were separated and the organic layer was dried over MgSO<sub>4</sub> and concentrated under reduced pressure. The resulting residue was purified by column chromatography (EtOAc:heptane = 1:3) to yield 392 mg of a white solid of **13** (0.95 mmol, 79%) with recovery of 41 mg starting material **12** (0.12 mmol, 10 %). *R*<sub>F</sub> = 0.49 (1:1, EtOAc:heptane); <sup>1</sup>H NMR (500 MHz, CDCl<sub>3</sub>)  $\delta$  7.35 (q, *J* = 8.9, 7.6 Hz, 10H), 5.33 – 5.04 (m, 4H), 4.91 (m, 1H), 4.68 (dp, *J* = 11.2, 3.9 Hz, 1H), 2.99 – 2.40 (m, 2H), 2.30 (s, 1H), 2.24 – 1.75 (m, 3H), 1.76 – 1.61 (m, 3H), 1.57 – 1.50 (m, 1H), 1.47 – 1.24 (m, 1H); <sup>13</sup>C NMR (126 MHz, CDCl<sub>3</sub>)  $\delta$  172.7, 136.6, 128.8, 128.6, 128.5, 128.2, 128.0, 67.6, 67.2, 53.5, 46.7, 45.8, 30.4, 30.2, 26.3, 15.7; HRMS (ESI+): calcd for C<sub>22</sub><sup>13</sup>C<sub>2</sub>H<sub>27</sub>NNaO<sub>5</sub> (*M*+Na<sup>+</sup>): 434.1854, found 434.1857.

**(2S)-6-(2-Oxopropyl-1,3-<sup>13</sup>C<sub>2</sub>)piperidine-2-carboxylic acid [14]**

To a degassed solution of **9** (382 mg, 0.90 mmol) in MeOH:water (7 ml, 6:1) was added Pd/C (15 mg, 0.14 mmol, 10 mol% Pd). The atmosphere was exchanged to hydrogen and the suspension was stirred for 4 h. The reaction mixture was filtered over Celite, concentrated under reduced pressure. The product was purified by chromatography on latro beads (0 -> 40% MeOH in DCM) and lyophilized to obtain 128 mg of **14** (0.68 mmol, 76%) as a white powder. <sup>1</sup>H NMR (500 MHz, D<sub>2</sub>O)  $\delta$  3.66 (dd, *J* = 12.4, 3.3 Hz, 1H), 3.60 (ddq, *J* = 12.5, 6.3, 3.2 Hz, 1H), 3.24 – 2.80 (m, 2H), 2.33 – 2.23 (m, 1H), 2.27 (dd, <sup>1</sup>*J*<sub>CH</sub> = 128.3, <sup>3</sup>*J* = 1.7 Hz, 3H), 2.05 – 1.86 (m, 2H), 1.73 – 1.40 (m, 3H); <sup>13</sup>C NMR (126 MHz, deuterium oxide)  $\delta$  60.2, 45.6, 45.5, 41.2, 29.7, 29.6, 27.7, 26.5, 26.3, 22.9, 22.1, 21.8, 21.5; HRMS (ESI+): calcd for C<sub>7</sub><sup>13</sup>C<sub>2</sub>H<sub>16</sub>NO<sub>3</sub>(*M*+H<sup>+</sup>): 188.1197, found 188.1198.

## Supplemental References

1. Akasaka K, Akamatsu H, Kimoto Y, Komatsu Y, Shimizu T, Shimomura N, et al. Synthesis of a New Dual Metalloprotease Inhibitor. I. Diastereoselective Alkylation of Protected 6-Oxopipicolinic Acid Esters. *Chemical & Pharmaceutical Bulletin*. 1999;47(11):1525-31.
2. Ling T, Danishefsky, S. (2009). Total synthesis of Salinosporamide A and analogs thereof. U.S. Patent No. 2009234137(A1). U.S. Patent and Trademark Office.
3. Sadilkova K, Gospe SM, and Hahn SH. Simultaneous determination of alpha-aminoadipic semialdehyde, piperidine-6-carboxylate and pipecolic acid by LC-MS/MS for pyridoxine-dependent seizures and folinic acid-responsive seizures. *Journal of Neuroscience Methods*. 2009;184(1):136-41.
4. Hasse K, Hess J, and Hörnig HW. Darstellung und Verhalten von 1.5-Didehydro-norhygrin und 1.6-Didehydro-isopelletierin. *Chemische Berichte*. 1971;104(8):2420-6.
5. Mikami K, Matsumoto S, Ishida A, Takamuku S, Suenobu T, and Fukuzumi S. Addition of Ketene Silyl Acetals to the Triplet Excited State of C60 via Photoinduced Electron Transfer Leading to the Fullereneacetates. *Journal of the American Chemical Society*. 1995;117(45):11134-41.
6. Botman PNM, Dommerholt FJ, de Gelder R, Broxterman QB, Schoemaker HE, Rutjes FPJT, et al. Diastereoselective Synthesis of (2S,5R)-5-Hydroxypipicolinic Acid and 6-Substituted Derivatives. *Organic Letters*. 2004;6(26):4941-4.
